# Supplementary material for: Systematic Literature Review of the Nutrient Status, Intake, and Diet Quality of Chinese Children across Different Age Groups
Source: MDPI journal article supplement (doi:10.3390/nu15061536), 2023-03-22
Supplement: s1 [file s1]

**Table S1.** The mean carbohydrate intake range, reported from different studies across different age groups compared to EAR, %EI. Green= above and within %EI.

| Age | EAR g/day | %E    | Mean intake (g/day) | %EI              | Ref        |
|-----|-----------|-------|---------------------|------------------|------------|
| 0   | 65 (AI)   | -     | 57.7- 75.3          |                  | [1]        |
| 0.5 | 80 (AI)   | -     | 105                 |                  | [2]        |
| 1   | 120       | 50-65 | 154.8- 243+         |                  | [2] [3]    |
| 4   | 120       | 50-65 | 225-243+            |                  | [4] [3]    |
| 7   | 150       | 50-65 | 182.42              |                  | [5]        |
| 11  | 150       | 50-65 | 182.42-282.2g/day   | 59% <sup>a</sup> | [6][5] [7] |
| 14  | 150       | 50-65 | 182.42-282.2g/day   | 59% <sup>a</sup> | [6][5] [7] |

<sup>a</sup> National data <sup>+</sup> median

**Table S2.** The mean protein intake range, reported from different studies across different age groups compared to RNI, EAR and UL. Green= above EAR/RNI.

| Age | RNI    | EAR | UL | Mean intake (g/day) | Ref           |
|-----|--------|-----|----|---------------------|---------------|
| 0   | 9 (AI) | -   | -  | 11-14               | [1]           |
| 0.5 | 20     | 15  | -  | 18.3-24.2           | [8][9] [2]    |
| 1   | 25     | 20  | -  | 26.3-79+            | [8][9][9] [3] |
| 4   | 30     | 20  | -  | 55.77-79+           | [4]           |
| 7   | 30     | 25  | -  | 48.3-116            | [10] [5] [3]  |
| 11  | 30     | 25  | -  | 48.3-116            | [10] [5]      |
| 14  | 35     | 25  | -  | 48.3-116            | [10] [5] [7]  |

<sup>+</sup> median

**Table S3.** The mean phosphorus intake range, reported from different studies across different age groups compared to RNI, EAR and UL. green= above EAR/RNI.

| Age | RNI      | EAR | UL | Mean intake (mg/day)               | % inadequacy       | Ref                     |
|-----|----------|-----|----|------------------------------------|--------------------|-------------------------|
| 0   | 100 (AI) | -   | -  | 158-278                            |                    | -                       |
| 0.5 | 180 (AI) | -   | -  | 441                                |                    | [2]                     |
| 1   | 300      | 250 | -  | 760-942                            |                    | [2] [3]                 |
| 4   | 350      | 290 | -  | 698 <sup>a</sup> -942 <sup>a</sup> | 10% <sup>a,c</sup> | [11] [3]                |
| 7   | 470      | 400 | -  | 690-698 <sup>a</sup>               |                    | [11] [5]                |
| 11  | 640      | 540 | -  | 698 <sup>a</sup> -1106             | 13% <sup>a,d</sup> | [11][7][5] <sup>b</sup> |
| 14  | 710      | 590 | -  | 935 <sup>a</sup> -1106             |                    | [11] [7]                |

<sup>a</sup> National data <sup>b</sup>= 690 omitted due to presence of national data <sup>c</sup> age group 3-12 years old <sup>d</sup> age group 13-17 years old.

## References

1. Ma, D.; Ning, Y.; Gao, H.; Li, W.; Wang, J.; Zheng, Y.; Zhang, Y.; Wang, P. Nutritional Status of Breast-Fed and Non-Exclusively Breast-Fed Infants from Birth to Age 5 Months in 8 Chinese Cities. *Asia Pac J Clin Nutr* **2014**, *23*, 282–292, doi:10.6133/apjcn.2014.23.2.16.
2. Li, Z.; van der Horst, K.; Edelson-Fries, L.R.; Yu, K.; You, L.; Zhang, Y.; Vinyes-Pares, G.; Wang, P.; Ma, D.; Yang, X.; et al. Perceptions of Food Intake and Weight Status among Parents of Picky Eating Infants and Toddlers in China: A Cross-Sectional Study. *Appetite* **2017**, *108*, 456–463, doi:10.1016/j.appet.2016.11.009.
3. Ma, Y.; Tan, J.; Tan, Z.; Shang, L. Validity and Reliability of Semiquantitative Food Frequency Questionnaires for Assessing Nutrient Intake among Preschool Children

in Northwest China. *Hindawi Journal of Healthcare Engineering* **2022**, doi:10.1155/2022/1677252.

4. Xue, Y.; Zhao, A.; Cai, L.; Yang, B.; Szeto, I.M.Y.; Ma, D.; Zhang, Y.; Wang, P. Growth and Development in Chinese Pre-Schoolers with Picky Eating Behaviour: A Cross-Sectional Study. *PLoS One* **2015**, *10*, doi:10.1371/journal.pone.0123664.
5. Zou, Y.; Zhang, R.-H.; Xia, S.-C.; Huang, L.-C.; Fang, Y.-Q.; Meng, J.; Chen, J.; Zhang, H.-X.; Zhou, B.; Ding, G.-Q. The Rural-Urban Difference in BMI and Anemia among Children and Adolescents. *Int J Environ Res Public Health* **2016**, *13*, doi:10.3390/ijerph13101020.
6. Yunzi, A.; Yu, L.; López-Olmedo, N.; Popkin, B.M.; Pac, A.; Clin, J.; Author, N. Analysis of Dietary Trends in Chinese Adolescents from 1991 to 2011. *Asia Pac J Clin Nutr* **2018**, *27*, 1106–1119, doi:10.6133/apjcn.042018.02.
7. Liu, D.; Ju, L.; Yang, Z.; Zhang, Q.; Gao, J.; Gong, D.; Guo, D.; Luo, S.; Zhao, W. Food Frequency Questionnaire for Chinese Children Aged 12-17 Years: Validity and Reliability. *Biomedical and Environmental Sciences* **2019**, *32*, 486–495, doi:10.3967/bes2019.066.
8. Jia, N.N.; Zhang, S.; Li, T.; Tan, Z.; Yin, Y.; Chen, L.; Li, C.; Liu, A.; Bindels, J.G.J.G.; Dai, Y. Dietary Survey of Anaemic Infants and Young Children in Urban Areas of China: A Cross-Sectional Study. *Asia Pac J Clin Nutr* **2015**, *24*, 659–664, doi:10.6133/apjcn.2015.24.4.05.
9. Li, H.Z.; Jia, H.X.; Liang, D.; Deng, T.T.; Niu, L.T.; Han, J.H. [Study on the Contribution Rate of Follow-up Formula to the Nutrient Intake of Infants and Young Children Aged 7-24 Months in China]. *Zhonghua Yu Fang Yi Xue Za Zhi* **2017**, *51*, 65–69, doi:10.3760/cma.j.issn.0253-9624.2017.01.013.
10. Zhou, H.; Wang, S.; Yin, H.; Chen, C.; Yang, Y.; Jiang, M.; Yang, L.; Guo, B.; Tang, H.; Zhang, Y.; et al. Nutrition and Health Survey of Children and Youth in Lishui District, Nanjing City. *Wei Sheng Yan Jiu* **2015**, *44*.
11. Meng, L.; Wang, Y.; Li, T.; Loo-Bouwman, C.A. van; Zhang, Y.; Man-Yau Szeto, I.; Annika Van Loo-Bouwman, C.; Zhang, Y.; Szeto, I.M.-Y.I.M.-Y.I.M.Y.; van Loo-Bouwman, C.A.C.A.; et al. Dietary Diversity and Food Variety in Chinese Children Aged 3–17 Years: Are They Negatively Associated with Dietary Micronutrient Inadequacy? *Nutrients* **2018**, *10*, 1674, doi:10.3390/nu10111674.
